# Supplementary material for: Ambulantes Verordnungsverhalten von Antibiotika und Einstellung zum Verordnungsfeedback
Source: Springer Nature journal article supplement (doi:10.1007/s44266-022-00007-x), 2023-01-27
Supplement: MOESM1 [file 23961082]

## Interviewleitfaden Version 1

Einführung: *(nicht ablesen, möglichst frei)*

Erst einmal vielen Dank, dass Sie sich die Zeit nehmen für dieses Interview.

Mein Name ist Anja Mentzel, ich bin Ärztin und wissenschaftliche Mitarbeiterin am Lehrbereich für Allgemeinmedizin am Universitätsklinikum Freiburg. Wie Sie im Aufklärungsbogen sicherlich schon gelesen haben, interessiere ich mich für Ihre Ansichten zum Thema Antibiotikaverschreibung und Verordnungsfeedback in der Hausarztpraxis.

Das Interview wird wie folgt ablaufen: Ich werde Ihnen zu bestimmten Themen offene Fragen stellen, bei denen Sie sich in Ihren Mitteilungen völlig frei fühlen dürfen. Es gibt keine richtigen oder falschen Antworten, mich interessiert alles, was für Sie relevant ist und ich bin neugierig auf Ihre Ansichten und Ideen.

Im Verlauf werde ich auch ein paar geschlossene Fragen zu bestimmten Aspekten stellen. Fühlen Sie sich auch hier frei, alles mitzuteilen, was Ihnen dazu einfällt und was Ihnen wichtig erscheint.

Sollten zwischendurch Fragen oder Unklarheiten auftauchen, können Sie dies jederzeit ansprechen.

Natürlich können Sie das Interview auch jederzeit und ohne negative Konsequenzen unterbrechen oder abbrechen.

Ein paar Worte zum Datenschutz:

Das Interview wird mit einem digitalen Tonbandgerät aufgezeichnet und anschließend transkribiert. Während des Interviews werde ich mir zusätzlich ein paar Notizen machen. Die Transkripte werden pseudonymisiert, sodass keine direkten Rückschlüsse auf Sie als Proband\*in gezogen werden können. Etwaige personenbezogene Daten, die in den Tonbandaufnahmen auftauchen, werden ebenfalls unkenntlich gemacht.

Auch in der Auswertung der Interviews werden keine direkten Rückschlüsse für Sie als Proband möglich sein. Falls Sie das möchten, kann ich Ihnen Ihr Transkript nach Erstellung zukommen lassen.

Haben Sie momentan noch Fragen zum Ablauf oder allgemein?

Dann würde ich vorschlagen, zu starten.

| Frage                                                                                                                                                                                                                                                                                                                                                                                                                                                                                                                                                                                                                                                                                                                                                                                                                                                                                                                                                                                                                                                                                                                                                                                                                                                                                                                                                                                                                                                                                                                                                                                                  | Mögliche Nachfragen/Aufrechterhaltungsfragen                                                                                                                                                                                                                                                                                                                                                                                                             | Interessierende Information                                                                                                                    |
|--------------------------------------------------------------------------------------------------------------------------------------------------------------------------------------------------------------------------------------------------------------------------------------------------------------------------------------------------------------------------------------------------------------------------------------------------------------------------------------------------------------------------------------------------------------------------------------------------------------------------------------------------------------------------------------------------------------------------------------------------------------------------------------------------------------------------------------------------------------------------------------------------------------------------------------------------------------------------------------------------------------------------------------------------------------------------------------------------------------------------------------------------------------------------------------------------------------------------------------------------------------------------------------------------------------------------------------------------------------------------------------------------------------------------------------------------------------------------------------------------------------------------------------------------------------------------------------------------------|----------------------------------------------------------------------------------------------------------------------------------------------------------------------------------------------------------------------------------------------------------------------------------------------------------------------------------------------------------------------------------------------------------------------------------------------------------|------------------------------------------------------------------------------------------------------------------------------------------------|
| <p><u>Haltung und Rolle der Interviewenden</u></p> <ul style="list-style-type: none"> <li>- Neugierig, unbedarft</li> <li>- Zwar ärztliche Kollegin, aber noch ohne Berufserfahrung (Alters- und Kompetenzunterschied), „unbeschrieben, unwissend, offen“</li> <li>- Wertschätzend, zugewandt</li> <li>- Zurückhalten, erzählen lassen</li> <li>- Niemals: Anklagen, unterstellen, altklug oder besserwiserisch wirken</li> <li>- vor allem am Telefon auf besonders freundliche Stimme achten, da Mimik und Körpersprache fehlen</li> </ul> <p><u>Allgemeine Formulierungen zur Aufrechterhaltung des Erzählflusses:</u></p> <ul style="list-style-type: none"> <li>- Möchten Sie das noch genauer erklären?</li> <li>- Das klingt interessant. Können Sie darauf noch einmal eingehen?</li> <li>- Sie erwähnten...Erzählen Sie mir noch etwas mehr dazu.</li> <li>- Das verstehe ich nicht genau.</li> <li>- Warum ist das so?</li> <li>- Wie kommen Sie zu diesem Urteil/dieser Aussage?</li> <li>- Fällt Ihnen dazu noch etwas ein?</li> <li>- Haben Sie noch weitere Ideen/Fragen/Anregungen dazu?</li> <li>- Was sind ihre Erfahrungen mit...?</li> <li>- Einfache Unterstützungen des Redeflusses wie „hmm“ und „ja“</li> <li>- Längere Pausen zulassen</li> </ul> <p>Zeitplan: Orientiert an Redefluss, insgesamt Fokus auf Block 4+5 setzen, 1-3 verkürzen falls nötig</p> <p><b>Markiert:</b> Anschlussfragen für bei ablehnender Haltung</p> <p>Offenheit der Fragen im Verlauf nach Frageblöcken:</p>  |                                                                                                                                                                                                                                                                                                                                                                                                                                                          |                                                                                                                                                |
| <p><b>Block 1: Eröffnungsthema</b></p> <p>In Ihrer Hausarztpraxis verschreiben Sie täglich <u>Medikamente</u>. Darunter sind sicher auch des Öfteren <u>Antibiotika</u>. Bei der Verschreibung <u>von Antibiotika</u> gibt es unterschiedliche <u>Strategien</u>. Wie <u>gehen Sie denn</u> da vor?</p>                                                                                                                                                                                                                                                                                                                                                                                                                                                                                                                                                                                                                                                                                                                                                                                                                                                                                                                                                                                                                                                                                                                                                                                                                                                                                                | <p>Sie sagten, Sie verlassen sich auf Ihre <u>Erfahrung</u>. Können Sie das noch ein wenig ausführen?/ Seit wann ist das so?</p> <p>Sie erwähnten <u>Leitlinien</u>. Erzählen Sie mir mehr dazu.<br/>       &gt;&gt; falls Leitlinien erwähnt, weiter in Block 2</p> <p><u>Was beeinflusst</u> noch ihre Entscheidung?</p> <p><u>Wie genau beeinflusst</u> das ihre Entscheidung?</p> <p><u>Wie sicher</u> fühlen Sie sich bei Ihren Entscheidungen?</p> | <p>Verschreibungsverhalten, erste Informationen, was die Entscheidung beeinflusst, falls spontan erwähnt: Zugang zum Umgang mit Leitlinien</p> |
| <p><b>Block 2: Thema</b></p>                                                                                                                                                                                                                                                                                                                                                                                                                                                                                                                                                                                                                                                                                                                                                                                                                                                                                                                                                                                                                                                                                                                                                                                                                                                                                                                                                                                                                                                                                                                                                                           |                                                                                                                                                                                                                                                                                                                                                                                                                                                          | <p>Perzeption von Leitlinien,</p>                                                                                                              |

|                                                                                                                                                                                                                                                                                                                                                                                                                                                                   |                                                                                                                                                                                                                                                                                                                                                                                                                                                                                                                                                                                                                                                                                                                                                                                                                                                                       |                                                                                                                                                    |
|-------------------------------------------------------------------------------------------------------------------------------------------------------------------------------------------------------------------------------------------------------------------------------------------------------------------------------------------------------------------------------------------------------------------------------------------------------------------|-----------------------------------------------------------------------------------------------------------------------------------------------------------------------------------------------------------------------------------------------------------------------------------------------------------------------------------------------------------------------------------------------------------------------------------------------------------------------------------------------------------------------------------------------------------------------------------------------------------------------------------------------------------------------------------------------------------------------------------------------------------------------------------------------------------------------------------------------------------------------|----------------------------------------------------------------------------------------------------------------------------------------------------|
| <p><b>Antibiotikaleitlinien, (falls nicht von selber erwähnt)</b></p> <p>Für die Verschreibung von Antibiotika werden von den Fachgesellschaften, wie der AWMF und der DEGAM, regelmäßig Leitlinien herausgegeben. Was sind ihre Erfahrungen hiermit?</p>                                                                                                                                                                                                         | <p><u>Wie arbeiten Sie</u> mit diesen Leitlinien im Praxisalltag?</p> <p>Zu welchen <u>Anlässen</u> schauen Sie da rein?</p> <p><u>Wo</u> genau sind diese Leitlinien, wenn Sie über eine Verordnung nachdenken/ zum Rezeptblock greifen? (im Kopf, schauen Sie nach)</p> <p>Wie <u>nehmen</u> Sie die Leitlinien <u>wahr</u>?</p> <p><u>Von wo</u> beziehen Sie die Leitlinien?</p> <p><b><u>Kam es schon vor, dass Sie mal Antibiotika verordnet haben entgegen der Empfehlungen? Warum?</u></b></p> <p><b>Sie sagten, die Leitlinien seien unhandlich/praxisfern/nur Empfehlungen. Was genau meinen Sie damit?</b></p> <p>Woran <u>orientieren</u> Sie sich <u>stattdessen</u>?</p> <p>Sie sagten, dass Leitlinien ihnen sehr <u>nicht wichtig</u> sind. Wie begründen Sie das? Seit wann ist das so?</p> <p>Ist das <u>nur bei Antibiotika-Leitlinien</u> so?</p> | <p>Adhärenz, Schwierigkeiten. Weitere, die Verschreibung beeinflussende Faktoren</p>                                                               |
| <p><b>Block 3: Thema Interventionen zur Leitlinienadhärenz:</b></p> <p>Sie wissen sicher, dass in den letzten Jahren <u>Antibiotikaresistenzen</u> ein großes Problem geworden sind. Oft wird genannt, dass insgesamt zu häufig oder nicht die richtigen Antibiotika verordnet werden.</p> <p>Wie denken Sie sollte man da im hausärztlichen Bereich <u>verfahren</u>?</p> <p>(ggf. ablesen, damit Trennung Interviewerin/mögliche Wahrnehmung als „Anklage“)</p> | <p>Welche von den genannten Strategien würden <u>Sie selber anwenden</u>?</p> <p>Wie gehen <u>Sie selbst</u> damit um?</p> <p>Wo sehen Sie, dass bei der Verordnung <u>eventuell innere Konflikte auftauchen</u>?</p> <p>Haben Sie eine <b><u>Vorstellung von sich/ zum eigenen Verordnungsverhalten</u></b>?</p> <p><b><u>Wie könnte man erreichen, dass Hausärzte weniger und passendere Antibiotika verschreiben? (obligat)</u></b></p> <p>Haben Sie mit ...schon Erfahrungen gemacht?</p> <p>Haben Sie noch weitere Ideen?</p> <p>Würden <u>Sie selber</u> in Ihrer Praxis ... begrüßen/ bei ... mitmachen?</p> <p><u>Wie wichtig</u> ist Ihnen das Thema insgesamt?</p> <p><b>Sie sehen keine Notwendigkeit. Warum nicht?</b></p>                                                                                                                                | <p>Meinungen, Interventionen, die die Verordnung optimieren könnten. Wo steht Verordnungsfeedback in der Wahrnehmung, wird es spontan genannt?</p> |
| <p><b>Block 4: Eröffnung Thema Verordnungsfeedback:</b></p>                                                                                                                                                                                                                                                                                                                                                                                                       | <p><u>Konkretisieren</u> Sie mal ihre <u>Vorstellung</u>, wie so etwas aussehen könnte</p>                                                                                                                                                                                                                                                                                                                                                                                                                                                                                                                                                                                                                                                                                                                                                                            | <p>Zugang zu Thema Verordnungsfeedback</p>                                                                                                         |

|                                                                                                                                                                                                                                               |                                                                                                                                                                                                                                                                                                                                                                                                                                                                                                                                                                                                                                                                                                                                                                                                                                                                                                                                                                                                                                                                                                                                                                                                                                                                                                                              |                                                 |
|-----------------------------------------------------------------------------------------------------------------------------------------------------------------------------------------------------------------------------------------------|------------------------------------------------------------------------------------------------------------------------------------------------------------------------------------------------------------------------------------------------------------------------------------------------------------------------------------------------------------------------------------------------------------------------------------------------------------------------------------------------------------------------------------------------------------------------------------------------------------------------------------------------------------------------------------------------------------------------------------------------------------------------------------------------------------------------------------------------------------------------------------------------------------------------------------------------------------------------------------------------------------------------------------------------------------------------------------------------------------------------------------------------------------------------------------------------------------------------------------------------------------------------------------------------------------------------------|-------------------------------------------------|
| <p>In anderen Ländern wie Großbritannien oder Schweden bekommen Ärzte regelmäßig <u>Feedback</u> darüber, wie viele und welche Antibiotika sie verschrieben haben und <u>wie treffend</u> ihre Verordnungen waren Was denken Sie darüber?</p> | <p>Könnten <u>Sie selber</u> sich vorstellen, regelmäßig solches Feedback zu erhalten?</p> <p>Wie sollte das Ihrer Meinung nach idealerweise <u>ablaufen</u>?</p> <p>Wie sollte so ein Feedback am besten <u>aussehen</u>?</p> <p>In welcher <u>Form</u> sollte es Sie erreichen/ wie sollte es <u>gestaltet</u> sein?</p> <p><u>Über welchen Weg</u> sollte Sie solches Feedback erreichen?</p> <p><u>Wer</u> sollte am Ehesten solches Feedback geben/überbringen?<br/>(Externer Kollege, Institution, Apotheker,...)</p> <p>Sollten mit dem Feedback noch <u>weitere Infos</u> geliefert werden?</p> <p>Was halten Sie von <u>Verbesserungsvorschlägen</u> und <u>Anweisungen</u>?</p> <p><u>Wie häufig</u> wäre Verordnungsfeedback für Sie nötig?</p> <p>Was denken Sie, würde ein solches Feedback bei Ihnen <u>bewirken</u>?</p> <p>Stellen Sie sich vor, Feedbacks wären <u>verpflichtend</u>. Wie fänden Sie das?</p> <p>Würden Sie <u>nur über sich selbst Bescheid</u> wissen wollen oder würden Sie <u>einen Vergleich</u> schätzen?</p> <p><u>Mit wem</u> würden Sie verglichen werden wollen?</p> <p>Würden Sie sich <u>zusätzlich zu dem Feedback</u> noch etwas wünschen?</p> <p>Haben Sie noch <u>weitere Ideen</u>?</p> <p><b>Sie denken, Sie bräuchten das nicht. Können Sie mir erklären, warum?</b></p> |                                                 |
| <p><i>Block 5:<br/>Konkretisierung<br/>Verordnungsfeedback:</i></p>                                                                                                                                                                           | <p>Welches Beispiel finden Sie am sinnvollsten?</p> <p>Warum jeweils?</p>                                                                                                                                                                                                                                                                                                                                                                                                                                                                                                                                                                                                                                                                                                                                                                                                                                                                                                                                                                                                                                                                                                                                                                                                                                                    | <p>Konkrete Beispiele, Präferenzen, Wirkung</p> |

|                                                                                                                                                                                                                                                                                                           |                                                                                                                                                                                                                                                                                                                                                                                                                                                                                                                                                                                                                 |                                                               |
|-----------------------------------------------------------------------------------------------------------------------------------------------------------------------------------------------------------------------------------------------------------------------------------------------------------|-----------------------------------------------------------------------------------------------------------------------------------------------------------------------------------------------------------------------------------------------------------------------------------------------------------------------------------------------------------------------------------------------------------------------------------------------------------------------------------------------------------------------------------------------------------------------------------------------------------------|---------------------------------------------------------------|
| <p>Ich habe Ihnen hier einige Beispiele mitgebracht, wie ein solches Verordnungsfeedback aussehen kann. Nehmen Sie sich bitte 2-3 Minuten Zeit um sich damit vertraut zu machen. - <i>2-3 Minuten warten</i> – Was sind Ihre Gedanken zu den Beispielen?</p> <p>(es werden die Beispiele 1-4 gezeigt)</p> | <p>Welches könnten Sie für sich selber vorstellen?</p> <p>Welches nicht?</p> <p>Warum/Warum nicht?</p> <p><b>Stellen Sie sich vor, Sie wären jetzt in diesem Feedback die Praxis, die am meisten Antibiotika verordnet (und alle würden das sehen). PAUSE. REAKTION ABWARTEN. Wie wäre das für Sie?</b></p> <p>Haben Sie eigene Ideen dazu?</p> <p><b>Falls ablehnende Haltung: Stellen Sie sich vor, im es wäre in Deutschland plötzlich Pflicht, dass Sie ein Verordnungsfeedback bekommen. Ich habe Ihnen hier verschiedene Beispiele mitgebracht. Wenn Sie sich die Anschauen, was denken Sie dazu?</b></p> |                                                               |
| <p><b>Block 5.1: Weitere Beispiele/Feldnotizen</b></p>                                                                                                                                                                                                                                                    | <p>Es werden die Beispiele 5-11 gezeigt und im „nicht wissenschaftlichen Fragestil“ die Meinung allgemein und zu bestimmten Aspekten abgefragt. Dies dient als Ergänzung der Schwerpunktbeispiele 1-4 und der Erkenntnisse zur Gestaltung von Feedback.</p>                                                                                                                                                                                                                                                                                                                                                     |                                                               |
| <p><b>Abschluss</b></p>                                                                                                                                                                                                                                                                                   | <p>Ist Ihnen noch etwas eingefallen, was Sie gerne sagen würden?</p> <p>Haben Sie noch Fragen?</p>                                                                                                                                                                                                                                                                                                                                                                                                                                                                                                              | <p>Unbeachtete Inhalte/Nachfragen/Klären von Unklarheiten</p> |
