# Supplementary material for: Ambulantes Verordnungsverhalten von Antibiotika und Einstellung zum Verordnungsfeedback
Source: Springer Nature journal article supplement (doi:10.1007/s44266-022-00007-x), 2023-01-27
Supplement: MOESM2 [file 23961082]

## Graphische Beispiele

**DISCLAIMER:** Alle Werte in den Graphiken beruhen nicht auf tatsächlichen Daten sondern sind modellhaft für die Studie erstellt. Alle genannten Namen oder Praxen sind rein fiktiv und entsprechen keinen tatsächlich existierenden Personen/Praxen.

### BEISPIEL 1

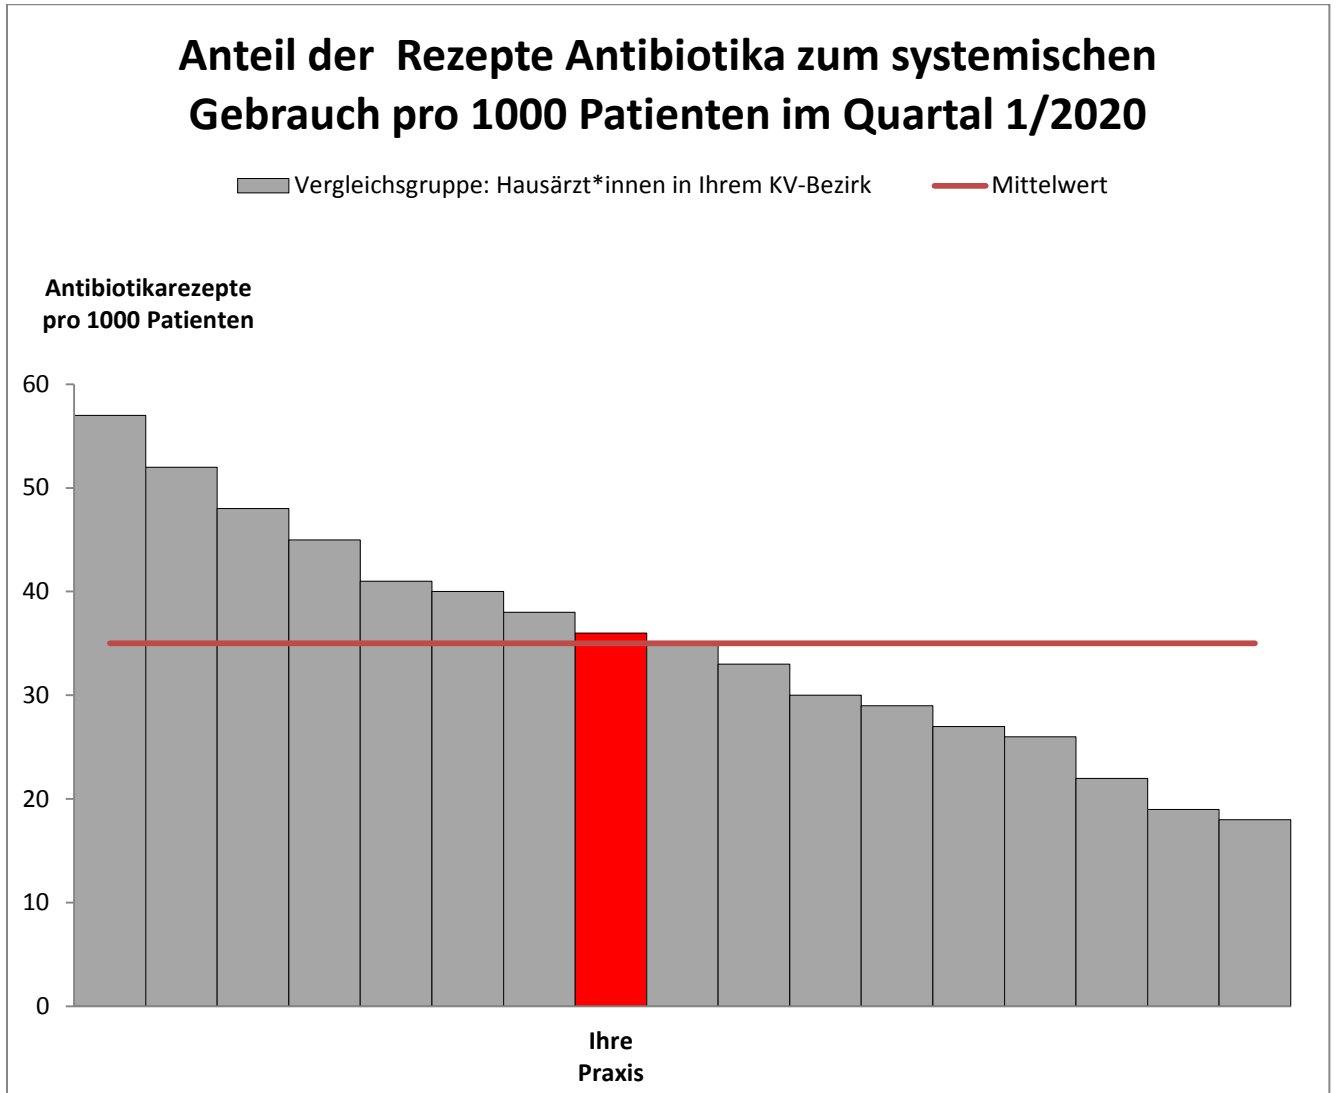

**BEISPIEL 2**

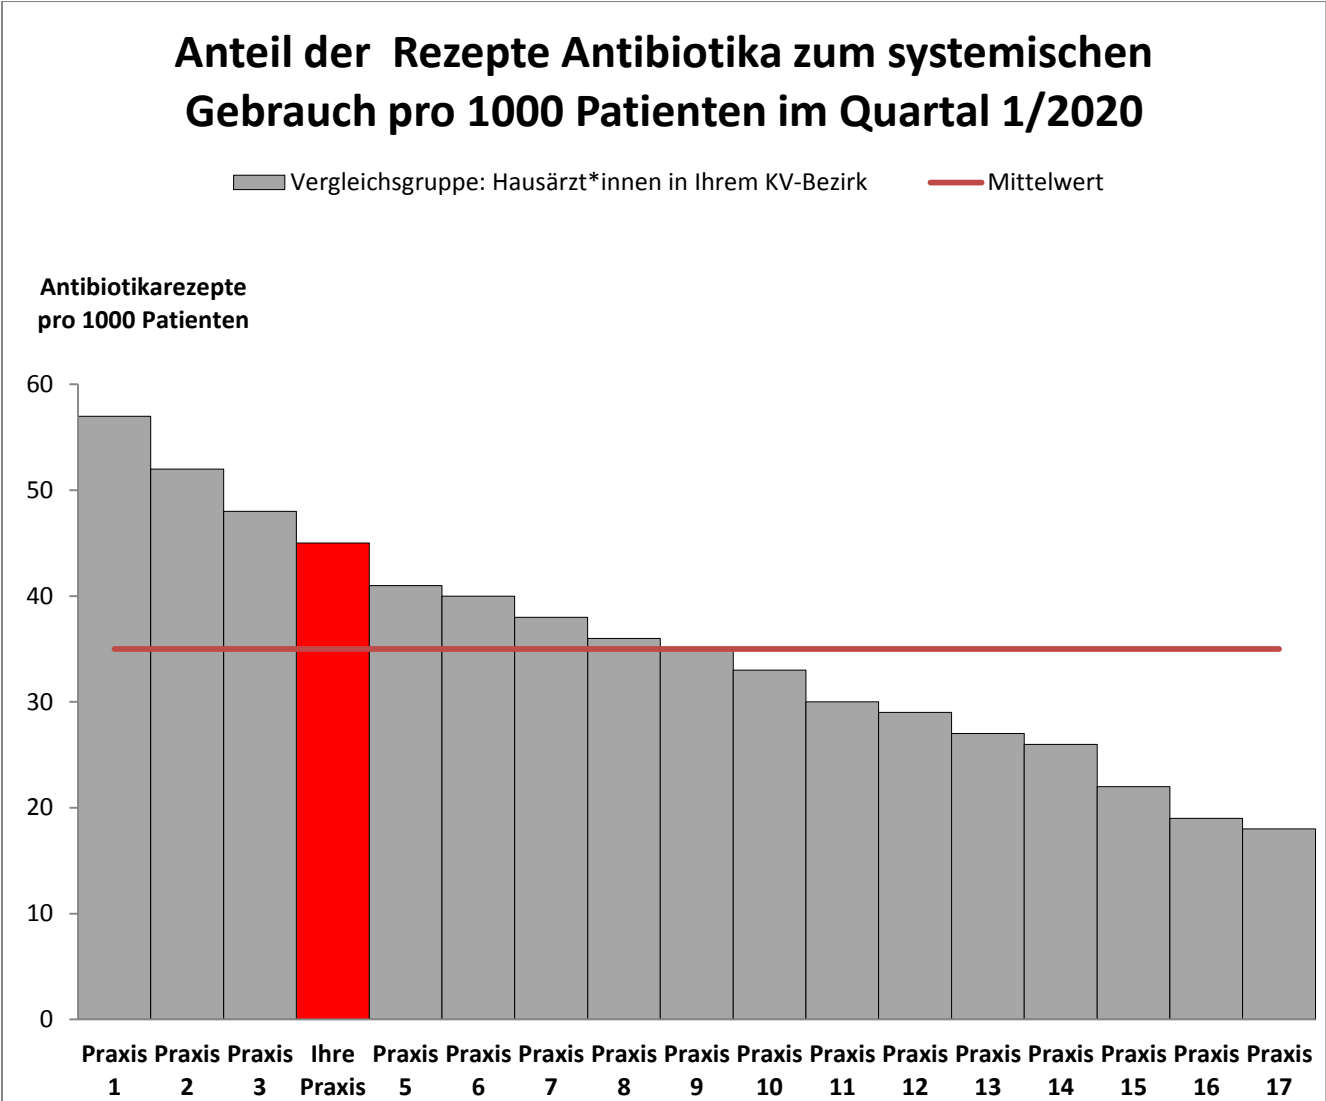

### BEISPIEL 3

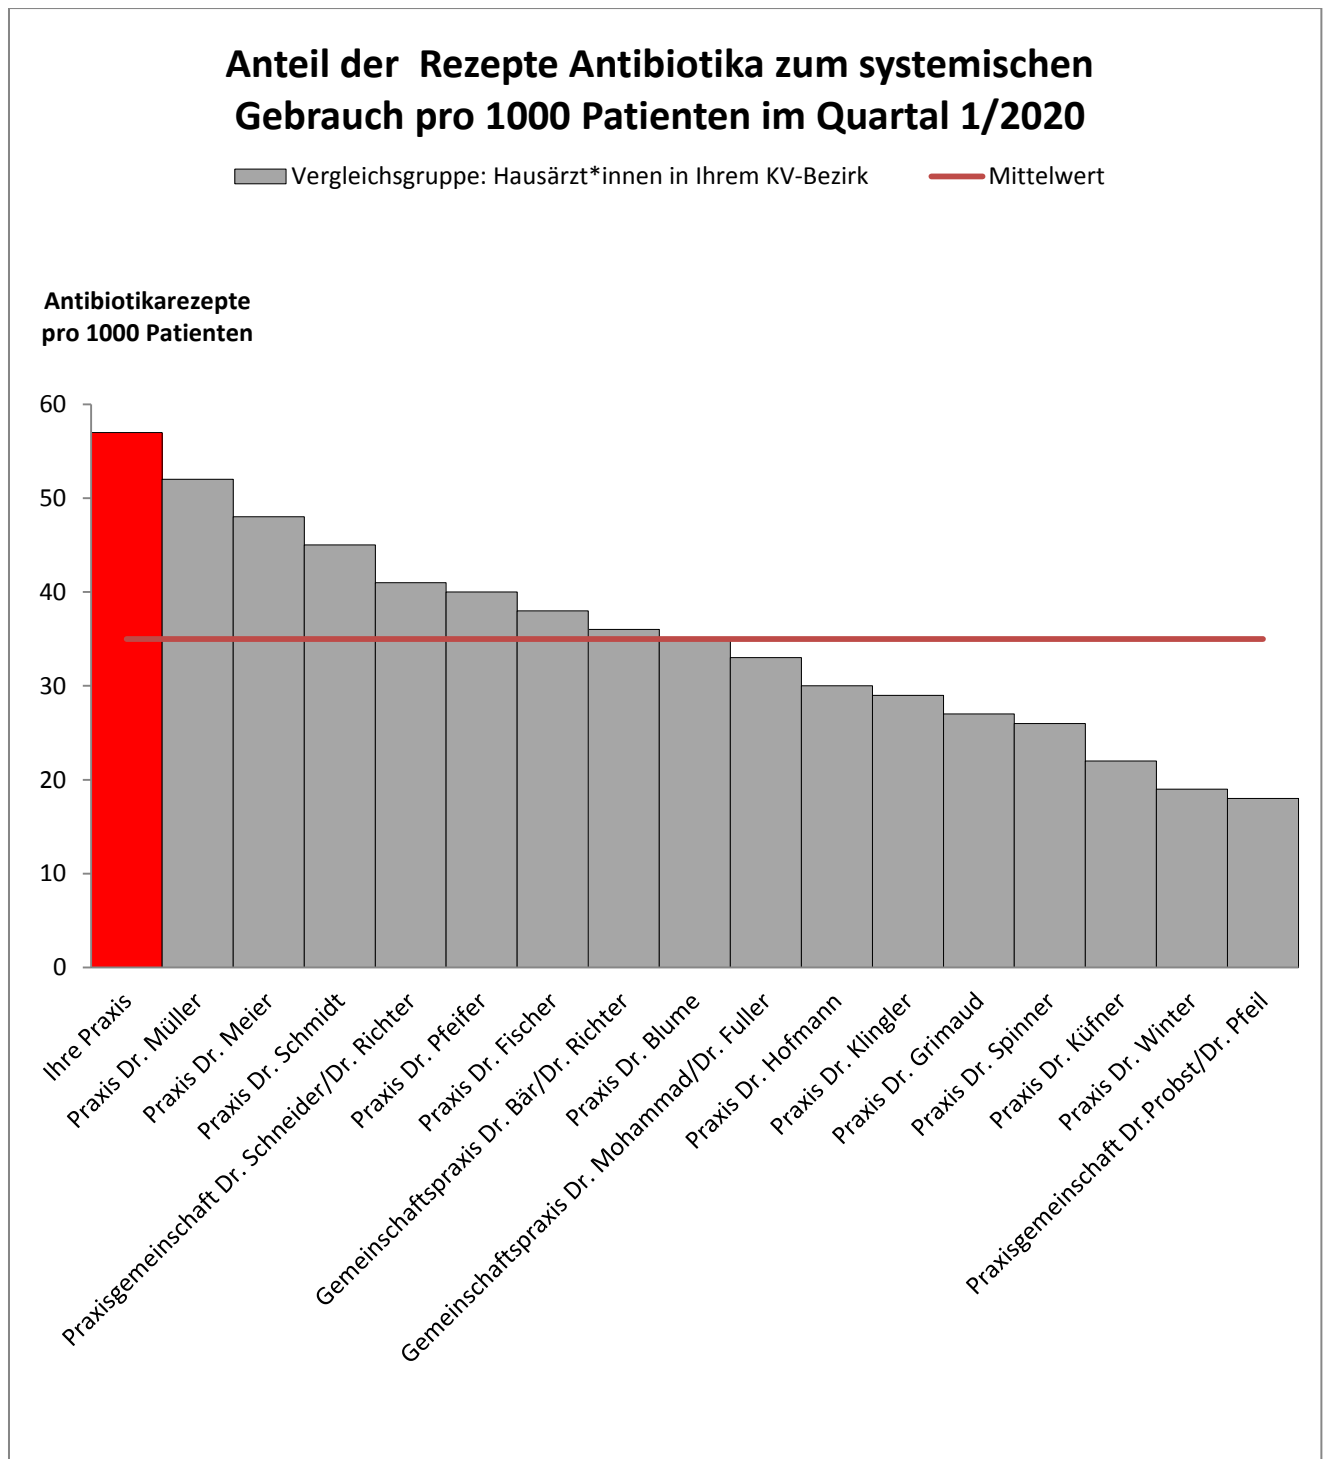

# Beispiele für Feldnotizen:

## BEISPIEL 4

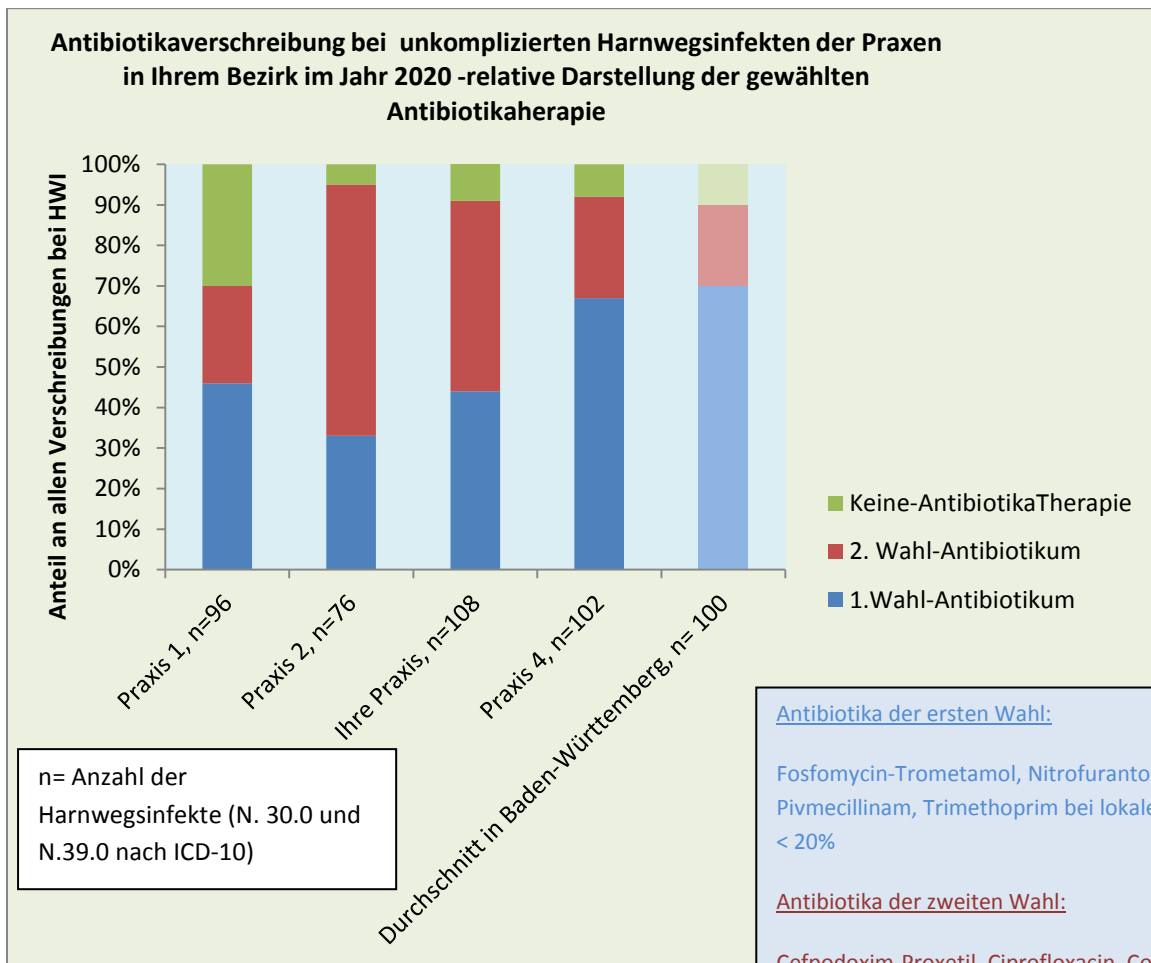

# BEISPIEL 5

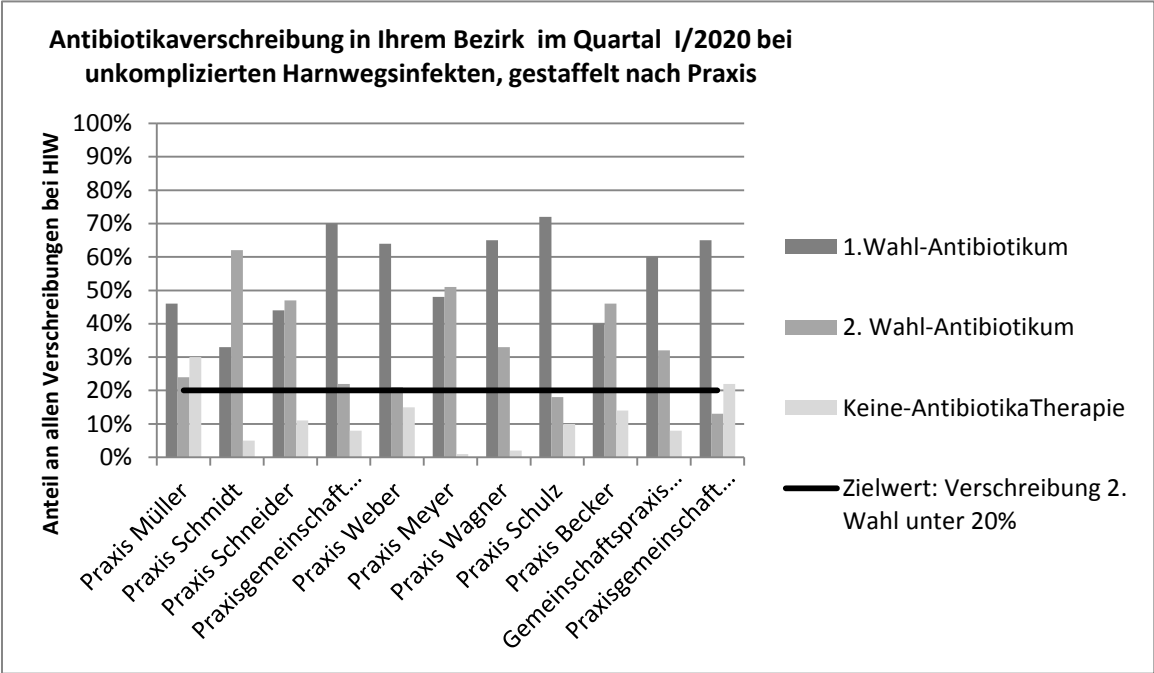

## BEISPIEL 6

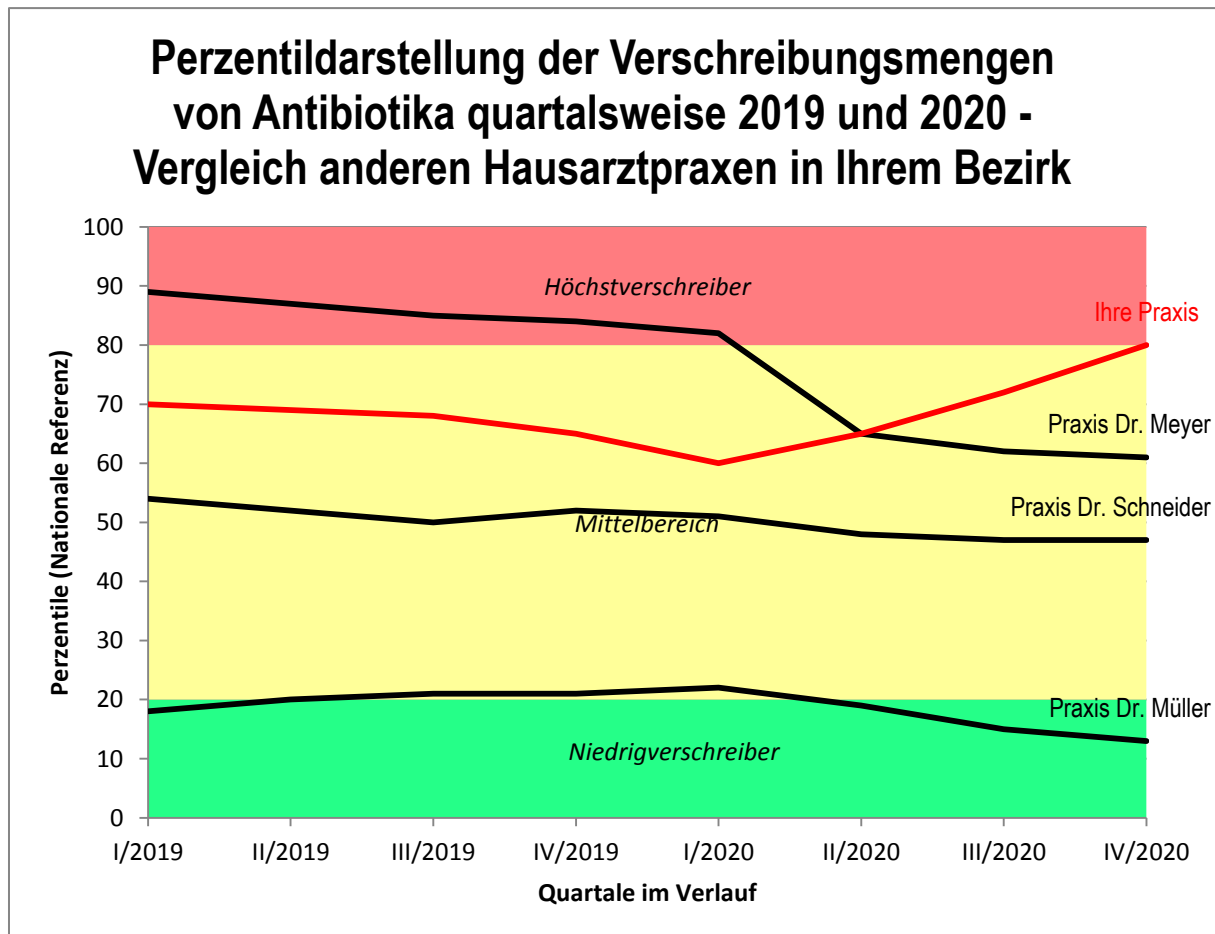

#### Erläuterung:

Dargestellt sind die Perzentilwerte der Verschreibung von Antibiotika zum systemischen Gebrauch der Hausarztpraxen in Ihren Bezirk in den verschiedenen Quartalen 2019 und 2020. Als Vergleichsgruppe zur Berechnung des Perzentilwertes wurden Daten von 10.000 Hausarztpraxen in Deutschland ausgewertet.

Beispiel: Ein Wert auf der 30. Perzentile bedeutet, dass 70% der Ärzte in Deutschland im entsprechenden Quartal mehr und 30% weniger Antibiotika verschrieben haben als Ihre Praxis.

# BEISPIEL 7

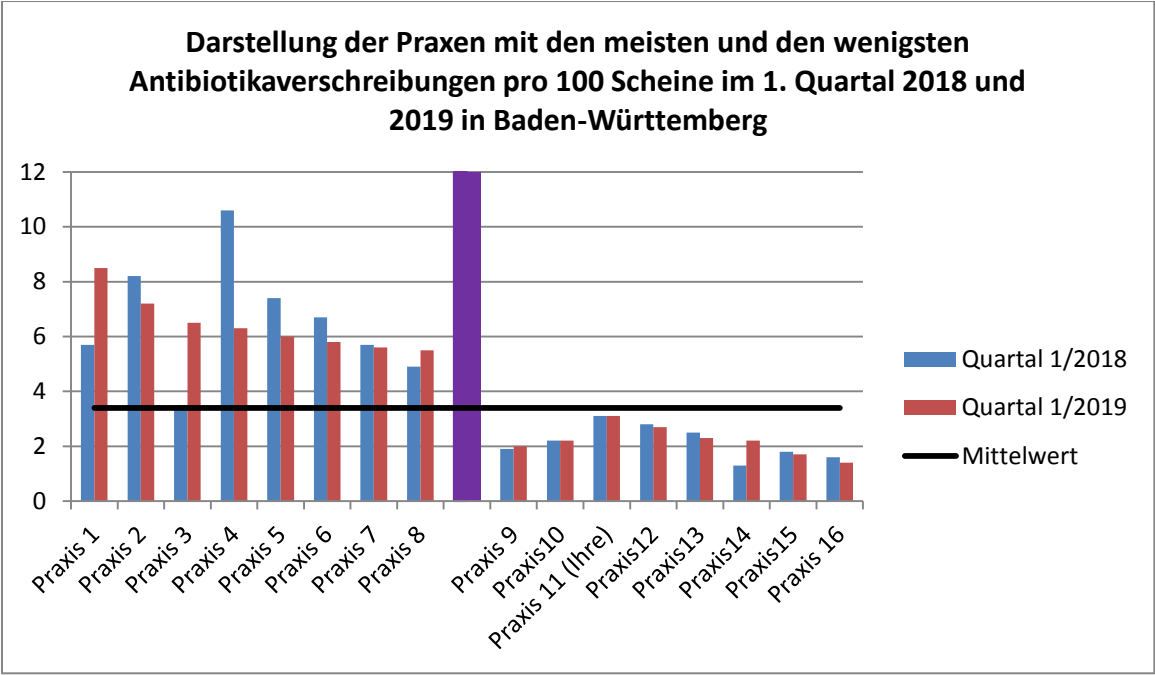

## BEISPIEL 8

### Perzentildarstellung der Verschreibungsmengen von Antibiotika, Gesamtbezugsgruppe: Nationale Referenz

Erläuterung: Ein Wert auf der 50. Perzentile bedeutet, dass im entsprechenden Quartal 50% der deutschen Hausarztpraxen mehr, und 50% weniger Antibiotika

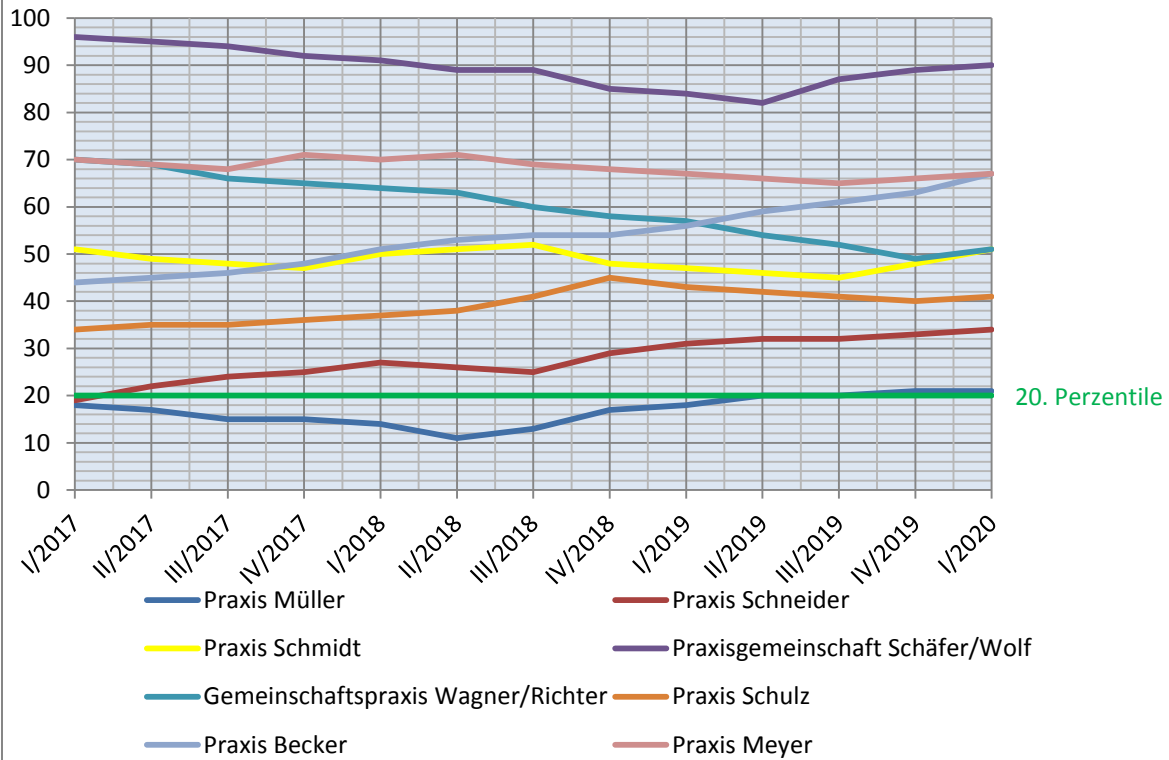



## BEISPIEL 9

Verschreibung von Antibiotika (Rezepte pro 1000 Patienten) zum systemischen Gebrauch in den Hausarztpraxen im Musterbezirk X in den Jahren 2018 und 2019

| Praxis                  | Januar-<br>Dezember<br>2018 | Januar-<br>Dezember<br>2019 | Differenz<br>absolut | Differenz<br>relativ<br>(gerundet) |
|-------------------------|-----------------------------|-----------------------------|----------------------|------------------------------------|
| Dr. Müller              | 322                         | 313                         | -9                   | -3%                                |
| Dr. Schneider           | 298                         | 300                         | +2                   | +1%                                |
| Dr. Schmidt             | 240                         | 220                         | -20                  | -8%                                |
| Dres.<br>Richter/Wagner | 411                         | 444                         | +33                  | +8%                                |
| Dr. Schumann            | 258                         | 253                         | -5                   | -2%                                |
| Dr. Hofmann             | 156                         | 149                         | -7                   | -4%                                |

## BEISPIEL 10

### Überblick Verordnungen der Praxis Dr.X : Antibiotika zur systemischen Anwendung

|                                       | Anzahl<br>Verordnungen | Ihre Praxis | Vergleich Ihre<br>Bezirksstelle | Vergleich Baden-<br>Württemberg |
|---------------------------------------|------------------------|-------------|---------------------------------|---------------------------------|
| <b>Amoxicillin</b>                    | 96                     | 44,2%       | 42,5%                           | 46,8%                           |
| <b>Cefaclor</b>                       | 41                     | 18,9%       | 17,6%                           | 12,0%                           |
| <b>Amoxicillin-<br/>Clavulansäure</b> | 30                     | 13,8%       | 1,1%                            | 0,7%                            |
| <b>Phenoxymethylpenicillin</b>        | 18                     | 8,3%        | 13,4%                           | 16,8%                           |
| <b>Clarithromycin</b>                 | 15                     | 6,9%        | 1,2%                            | 1,0%                            |
| <b>Cefadroxil</b>                     | 10                     | 4,6%        | 0,0%                            | 0,0%                            |
| <b>Cotrimoxazol</b>                   | 10                     | 4,6%        | 1,4%                            | 0,7%                            |
| <b>Cefixim</b>                        | 9                      | 4,1%        | 0,0%                            | 0,0%                            |
| <b>Doxycyclin</b>                     | 2                      | 0,9%        | 0,0%                            | 0,0%                            |
| <b>Minocyclin</b>                     | 2                      | 0,9%        | 0,0%                            | 0,0%                            |
| <b>Weitere</b>                        | 3                      | 1,4%        | 22,8%                           | 15,6%                           |
| <b>Summe Top 10</b>                   | 214                    | 98,6%       |                                 |                                 |
| <b>Gesamtsumme</b>                    | 217                    | 100,0%      |                                 |                                 |

## BEISPIEL 11

| Auswertung der Antibiotikaverordnung von Praxis Dr. Müller bei Harnwegsinfektionen |           |         |           |           |
|------------------------------------------------------------------------------------|-----------|---------|-----------|-----------|
| Quartal                                                                            | 01/2019   | 02/2019 | 03/2019   | 04/2019   |
| Anzahl Patienten mit Harnwegsinfektionen                                           | 25        | 30      | 18        | 22        |
| Davon mit Antibiotikaverordnung                                                    | 15        | 20      | 15        | 9         |
| Fosfomycin-Trometamol                                                              | 5 (33,3%) | 5 (25%) | 4 (26,6%) | 2 (22,2%) |
| Nitrofurantoin                                                                     | 3 (20%)   | 4 (20%) | 3 (20%)   | 4 (44,4%) |
| Pivmecillinam                                                                      |           | 6 (30%) | 4 (26,6%) |           |
| Trimethoprim                                                                       |           |         |           | 2 (22,2%) |
| Cephalosporine                                                                     | 2 (13,3%) | 3 (15%) |           | 1 (11,1%) |
| Chinolone                                                                          | 4 (26,6%) | 2 (10%) | 2 (13,3%) |           |
| Cotrimoxazol                                                                       | 1 (6,6%)  |         | 2 (13,3%) |           |
| Antibiotika-Einsatz bei Harnwegsinfektionen                                        | 60%       | 66,6%   | 83,3%     | 41%       |

Eine Antibiotische Behandlung soll nur bei klinischen Beschwerden erfolgen. Ein positiver Teststreifen indiziert nur in Ausnahmefällen eine Behandlung (z.B. Schwangere). Bei milden Beschwerden und fehlenden Risikofaktoren ist eine rein symptomatische Behandlung unter Umständen vertretbar. Prüfen Sie die Möglichkeit zur verzögerten Verschreibung (Einlösung des Rezeptes nur bei fehlender Besserung über 48h).

Fluorchinolone und Cephalosporine sollten nicht als Mittel der ersten Wahl eingesetzt werden. Cotrimoxazol hat im Vergleich zu Trimethoprim ein ungünstigeres Nebenwirkungsspektrum und sollte nicht als Mittel der ersten Wahl eingesetzt werden.

Für Kinder und weitere besondere Patientengruppen gelten teils abweichende Empfehlungen. Für detaillierte Informationen: Interdisziplinäre S3-Leitlinie Epidemiologie, Diagnostik, Therapie, Prävention und Management unkomplizierter, bakterieller, ambulant erworbener Harnwegsinfektionen bei erwachsenen Patienten (Aktualisierung 2017) (URL: <http://www.awmf.org/leitlinien/detail/II/043-044.html>, Stand: 31.03.2020)

## BEISPIEL 12 (ausführliches Audit, optional)

### Ciprofloxacin-Audit für Praxiszentrum Musterärzte: Verschreibung von Ciprofloxacin im 4. Quartal 2019

Durchgeführt durch Anna Asklepios, Fachapothekerin und Siegbert Supervise, Arzt und Praxisberater

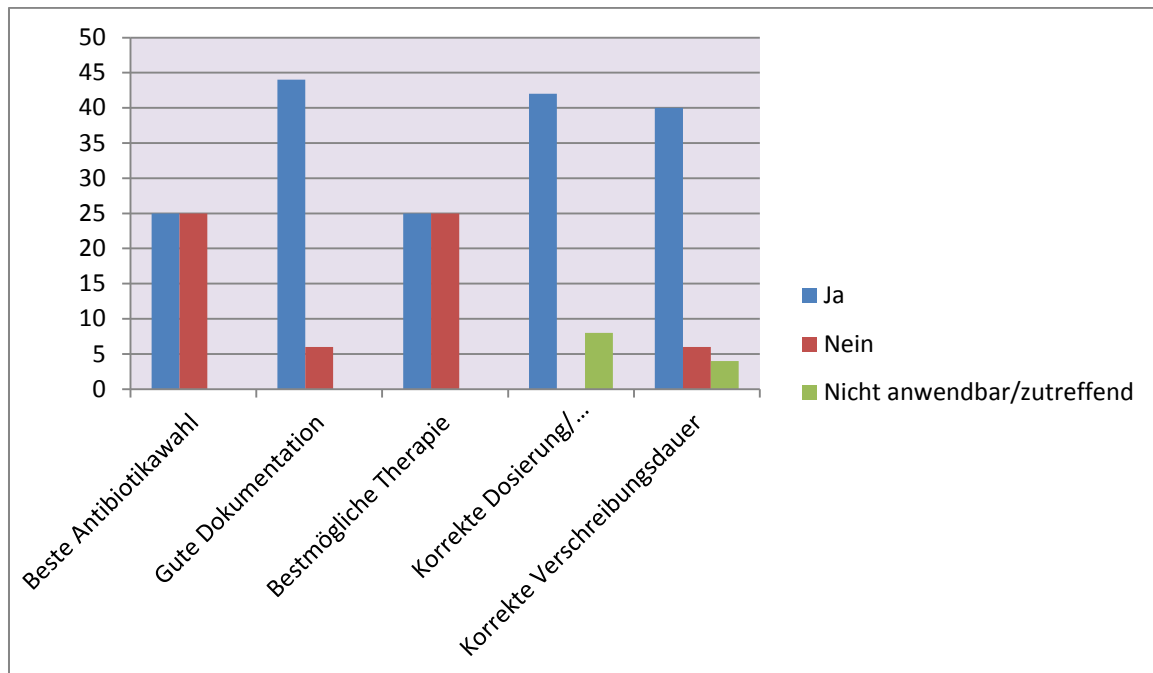

#### Interpretation:

Bei insgesamt 50 von 25.000 Patienten-Kontakten wurde zwischen August und Dezember 2019 Ciprofloxacin verschrieben. Im Vergleich zur letzten Erhebung im August, bei der bei 20:000 Patientenkontakten 60 mal Ciprofloxacin verschrieben wurde, ergibt dies eine Reduzierung um 33%.

Trotzdem war in 25 von 50 Fällen Ciprofloxacin nicht indiziert.

- In 2 Fällen wurde Ciprofloxacin für Hautinfektionen verschrieben
- 8 mal wurde Ciprofloxacin bei Gastroenteritis verschrieben, wovon in einem Fall gleichzeitig ein Harnwegsinfekt vorlag, bei welchem Ciprofloxacin ebenfalls nicht die erste Wahl gewesen wäre.
- In 10 Fällen wurde Ciprofloxacin für Epididymitis verschrieben, obwohl Ofloxacin oder Doxycyclin indiziert gewesen wären.
- In 5 Fällen wurde es für Pyleonephritis verschrieben, obwohl Cefalexin die erste Wahl gewesen wäre.

In 25 Fällen war die Verordnung von Ciprofloxacin rational gut begründet nach Leitlinien indiziert:

- 16 Fälle mit Pyelonephritis und Penicillinallergie
- 2 Fälle mit Epididymitis, mit früheren Episoden ebenfalls unter Ciprofloxacin
- 4 Fälle mit akuter Divertikulitis in Kombination mit Metronidazol bei Patienten mit Penicillin-Allergie
- 3 Fälle mit Pyelonephritis, in denen nach Entlassung aus dem Krankenhaus ein als Flüssigkeit verabreichbares Antibiotikum gebraucht wurde

#### Empfehlungen:

- Bei insgesamt geringen Verschreibungszahlen empfehlen wir das nächste Audit in einem halben Jahr
- Kollegen mit fehlerhaften Verschreibungen sollten darauf angesprochen werden und auf Schulungsangebote hingewiesen werden
- Wir empfehlen eine regelmäßige Auffrischung der Kenntnisse laut Leitlinien
